# Supplementary material for: Cognitive biases associated with medical decisions: a systematic review
Source: Springer Nature journal article supplement (doi:10.1186/s12911-016-0377-1), 2016-11-03
Supplement: 12911_2016_377_MOESM2_ESM.pdf [file 12911_2016_377_MOESM2_ESM.pdf]

## NEWCASTLE - OTTAWA QUALITY ASSESSMENT SCALE COHORT STUDIES

Note: A study can be awarded a maximum of one star for each numbered item within the Selection and Outcome categories. A maximum of two stars can be given for Comparability

### **Selection**

- 1) Representativeness of the exposed cohort
  - a) truly representative of the average \_\_\_\_\_ (describe) in the community ✱
  - b) somewhat representative of the average \_\_\_\_\_ in the community ✱
  - c) selected group of users eg nurses, volunteers
  - d) no description of the derivation of the cohort
- 2) Selection of the non exposed cohort
  - a) drawn from the same community as the exposed cohort ✱
  - b) drawn from a different source
  - c) no description of the derivation of the non exposed cohort
- 3) Ascertainment of exposure
  - a) secure record (eg surgical records) ✱
  - b) structured interview ✱
  - c) written self report
  - d) no description
- 4) Demonstration that outcome of interest was not present at start of study
  - a) yes ✱
  - b) no

### **Comparability**

- 1) Comparability of cohorts on the basis of the design or analysis
  - a) study controls for \_\_\_\_\_ (select the most important factor) ✱
  - b) study controls for any additional factor ✱ (This criteria could be modified to indicate specific control for a second important factor.)

### **Outcome**

- 1) Assessment of outcome
  - a) independent blind assessment ✱
  - b) record linkage ✱
  - c) self report
  - d) no description
- 2) Was follow-up long enough for outcomes to occur
  - a) yes (select an adequate follow up period for outcome of interest) ✱
  - b) no
- 3) Adequacy of follow up of cohorts
  - a) complete follow up - all subjects accounted for ✱
  - b) subjects lost to follow up unlikely to introduce bias - small number lost - > \_\_\_\_ % (select an adequate %) follow up, or description provided of those lost) ✱
  - c) follow up rate < \_\_\_\_% (select an adequate %) and no description of those lost
  - d) no statement

**Table S2- Summary of Data quality**

| Author                      | Selection          |           |               |               | Comparability | Outcome    |           |          | Total score |
|-----------------------------|--------------------|-----------|---------------|---------------|---------------|------------|-----------|----------|-------------|
|                             | Representativeness | Selection | Ascertainment | Demonstration | Comparability | Assessment | Follow up | Adequacy |             |
| Mamede <sup>30</sup>        | 1                  | 0         | 1             | 1             | 0             | 1          | 0         | 1        | 5           |
| Msaouel <sup>31</sup>       | 1                  | 0         | 1             | 0             | 1             | 1          | 0         | 1        | 5           |
| Stiegler <sup>45</sup>      | 1                  | 0         | 1             | 0             | 0             | 1          | 0         | 1        | 4           |
| Meyer <sup>55</sup>         | 1                  | 0         | 1             | 0             | 0             | 1          | 0         | 1        | 4           |
| Gupta <sup>46</sup>         | 1                  | 1         | 1             | 0             | 1             | 1          | 0         | 1        | 6           |
| Crowley <sup>47</sup>       | 1                  | 0         | 1             | 0             | 0             | 1          | 0         | 1        | 4           |
| Dibonaventura <sup>43</sup> | 1                  | 1         | 0             | 0             | 0             | 1          | 0         | 1        | 4           |
| Redelmeier <sup>42</sup>    | 1                  | 0         | 1             | 0             | 0             | 1          | 0         | 1        | 4           |
| Ross <sup>32</sup>          | 1                  | 1         | 1             | 0             | 1             | 1          | 0         | 1        | 6           |
| Sorum <sup>41</sup>         | 1                  | 0         | 0             | 0             | 1             | 1          | 0         | 1        | 4           |
| Bytzer <sup>40</sup>        | 1                  | 0         | 1             | 0             | 0             | 1          | 0         | 1        | 4           |
| Graber <sup>39</sup>        | 1                  | 0         | 0             | 0             | 1             | 1          | 0         | 1        | 4           |
| Yee <sup>38</sup>           | 1                  | 1         | 1             | 0             | 2             | 1          | 0         | 1        | 7           |
| Reyna <sup>37</sup>         | 0                  | 0         | 1             | 0             | 2             | 1          | 0         | 1        | 5           |
| Baldwin <sup>36</sup>       | 1                  | 1         | 1             | 0             | 1             | 0          | 0         | 1        | 5           |
| Mamade <sup>60</sup>        | 0                  | 0         | 1             | 0             | 0             | 1          | 0         | 1        | 3           |
| Friedman <sup>33</sup>      | 0                  | 0         | 1             | 0             | 1             | 1          | 0         | 1        | 4           |
| Ogdie <sup>34</sup>         | 1                  | 0         | 0             | 0             | 0             | 1          | 0         | 1        | 3           |
| Perneger <sup>35</sup>      | 1                  | 0         | 1             | 0             | 1             | 0          | 0         | 1        | 4           |
| Saposnik <sup>44</sup>      | 1                  | 0         | 1             | 0             | 1             | 1          | 0         | 1        | 5           |

Each number represents a positive point if that attribute was fulfilled according to the Newcastle-Ottawa Scale (NOS).<sup>2</sup>
